# Supplementary material for: Polymer nanocomposites using click chemistry: novel materials for hydrogen peroxide vapor sensors
Source: Royal Society of Chemistry journal article supplement (doi:10.1039/c5ra10952c), 2015-01-01
Supplement: c5ra10952c1.pdf [file c5ra10952c1.pdf]

## Supplementary Information

### Polymer Nanocomposites using Click Chemistry: Novel Materials for Hydrogen Peroxide Vapor Sensors

Payal Mazumdar,<sup>a</sup> Sunita Rattan,<sup>\*a</sup> Monalisa Mukherjee<sup>b,c</sup>

<sup>a</sup>Amity institute of Applied Sciences, Amity University, Noida, Uttar Pradesh, Sector-125, Noida.

**Email:** srattan@amity.edu.

<sup>b</sup>Amity Institute of Click chemistry Research and Studies, Amity University, Noida, Uttar Pradesh, Sector-125, Noida.

<sup>c</sup>Amity institute of Biotechnology, Amity University, Noida, Uttar Pradesh, Sector-125, Noida.

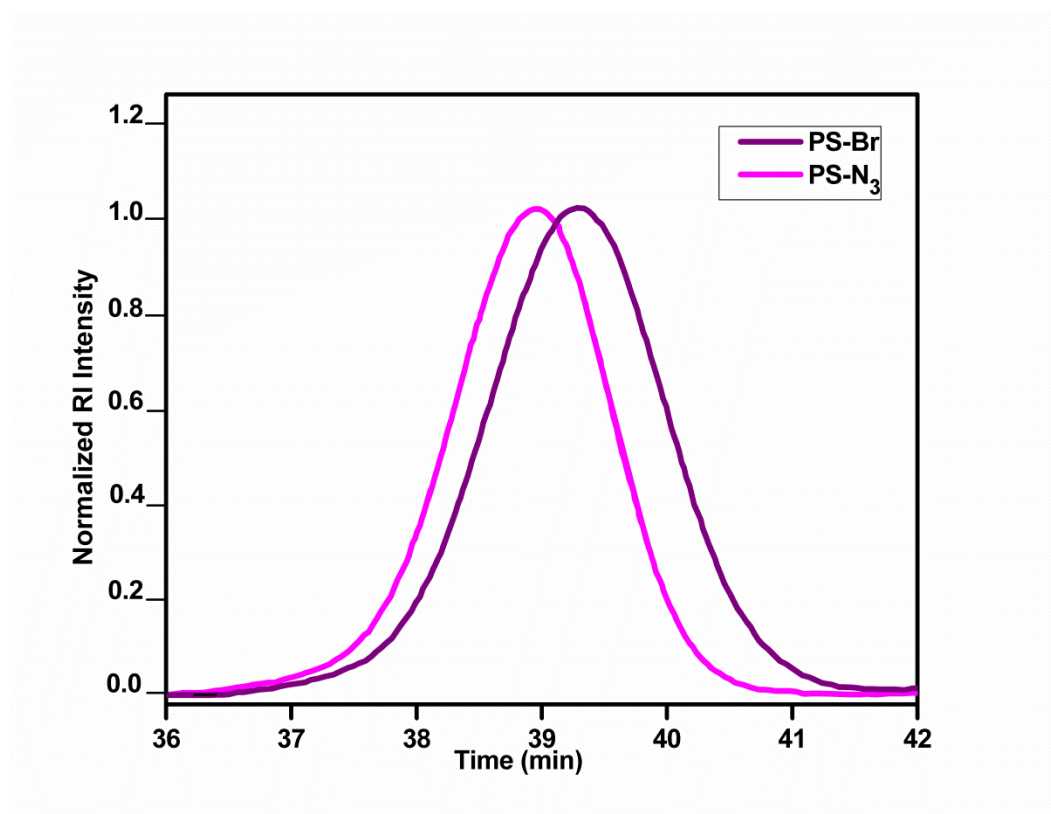

**Fig. ES 1:** GPC curves of PS-Br (Violet) and PS-N<sub>3</sub> (Pink). THF was used as the eluent and PS standards were used for the calibration.

| Sample            | Retention time (min) | M <sub>n</sub> | PDI  |
|-------------------|----------------------|----------------|------|
| PS-Br             | 39.31                | 2360           | 1.07 |
| PS-N <sub>3</sub> | 38.95                | 2770           | 1.06 |

**Table ES 2:** Tabular representation of GPC data for PS-Br and PS- N<sub>3</sub>

GPC shows clear shift of PS-Br to PS-N<sub>3</sub> illustrating towards higher molecular weight and low PDI indicating the presence of well controlled process. Recent ATRP techniques have developed rapidly for facile preparation of a variety of polymeric materials with predetermined M<sub>n</sub>, low PDI, and high degrees of chain-end functionalization. Atom transfer radical polymerization can be performed at ambient temperature is less prone to side reactions and chain transfer, resulting in better control over molecular weight and polydispersion index (PDI) thus enabling the facile synthesis of a wide variety of hybrid materials. However, the PDI values are still relatively low for highly branched, multi-chain polymeric structures.
